# Supplementary material for: Safety and bioactive potential of nanoparticles containing Cantaloupe melon (Cucumis melo L.) carotenoids in an experimental model of chronic inflammation
Source: PubMed Central journal article supplement — Biotechnol Rep (Amst). 2020 Nov 21;28:e00567. doi: 10.1016/j.btre.2020.e00567 (PMC7714681; doi:10.1016/j.btre.2020.e00567), 2020-11-21
Supplement: mmc2.pdf [file mmc2.pdf]

## Supplementary Data

**Supplementary Table S1.** Statistical value for Spearman's correlation coefficient ( $r$ ) and p value for histopathological parameters evaluated by a semiquantitative analysis of the four groups of Wistar rats.

|      |         | PVI     | PUV    | PVA     | PVN      | PIGI  |
|------|---------|---------|--------|---------|----------|-------|
| PVI  | $r$     | 1.000   |        |         |          |       |
|      | p value | .       |        |         |          |       |
| PUV  | $r$     | -0.280  | 1.000  |         |          |       |
|      | p value | 0.260   | .      |         |          |       |
| PVA  | $r$     | -0.376  | -0.189 | 1.000   |          |       |
|      | p value | 0.124   | 0.453  | .       |          |       |
| PVN  | $r$     | -0.481* | -0.261 | 0.506*  | 1.000    |       |
|      | p value | 0.043   | 0.296  | 0.032   | .        |       |
| PIGI | $r$     | 0.520*  | 0.199  | -0.566* | -0.786** | 1.000 |
|      | p value | 0.027   | 0.429  | 0.09    | 0.000    | .     |

$r$  : Spearman's correlation coefficient. \*:  $p < 0.05$ . \*\*:  $p < 0.01$ .

n (number of rats evaluated) = 20.

PVI: percentage of villus integrity. PUV: percentage of ulcerated villi. PVA: percentage of villous absence. PVN: percentage of villous necrosis. PIGI: percentage of intestinal gland integrity.

**Supplementary Table S2.** Spearman correlations for the different histopathological parameters of the kidneys for the four groups of Wistar rats evaluated.

|     |          | PHT    | GH     | THC   | BSD   | IIF   |
|-----|----------|--------|--------|-------|-------|-------|
| PHT | <i>r</i> | 1.000  |        |       |       |       |
|     | p value  | .      |        |       |       |       |
| GH  | <i>r</i> | -0.059 | 1.000  |       |       |       |
|     | p value  | 0.817  | .      |       |       |       |
| THC | <i>r</i> | 0.343  | -0.171 | 1.000 |       |       |
|     | p value  | 0.163  | 0.496  | .     |       |       |
| BSD | <i>r</i> | 1.000  | -0.059 | 0.343 | 1.000 |       |
|     | p value  | .      | 0.817  | 0.163 | .     |       |
| IIF | <i>r</i> | 0.153  | 0.383  | 0.000 | 0.153 | 1.000 |
|     | p value  | 0.543  | 0.116  | 1.000 | 0.543 | .     |

*r* : Spearman's correlation coefficient.

n (number of rats evaluated) = 20.

PHT: presence of hypertrophic tubules. GH: glomerular hyalinization. THC: tubular hyaline cylinders. BSD: Bowman's space dilation. IIF: inflammatory infiltrate foci.

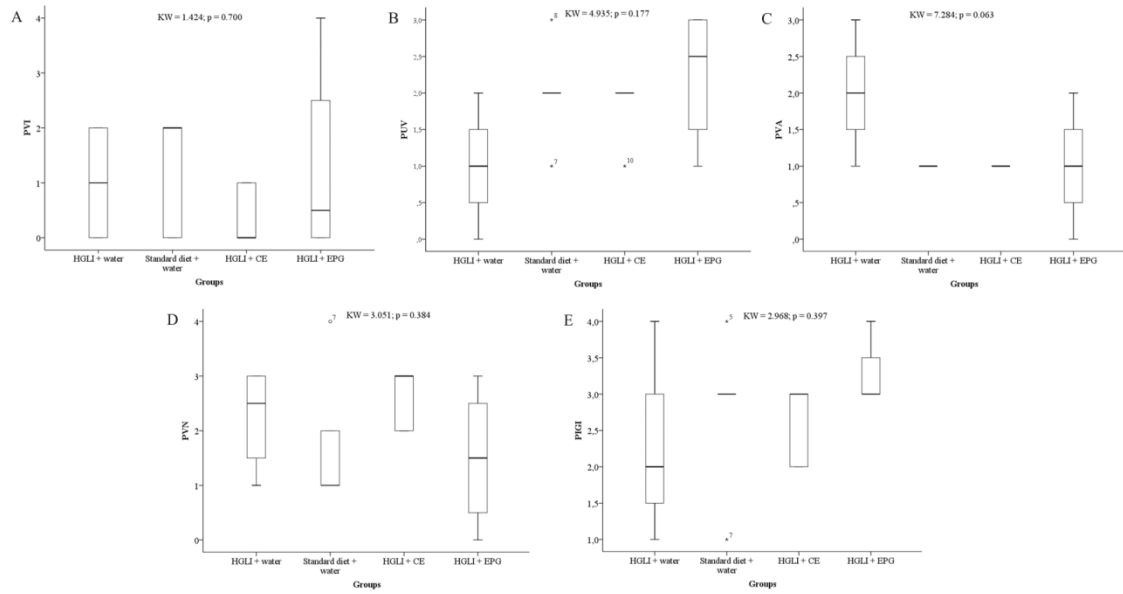

**Supplementary Fig. S1. Scores of semiquantitative histopathological evaluation of the intestinal sections of the four groups of Wistar rats submitted to different treatments for ten days.** (A) PVI: percentage of villus integrity. (B) PUV: percentage of ulcerated villi. (C) PVA: percentage of villous absence. (D) PVN: percentage of villous necrosis. (E) PIGI: percentage of intestinal gland integrity. KW: Kruskal-Wallis test. CE: crude carotenoid extract from Cantaloupe melon (*Cucumis melo* L.). EPG: crude carotenoid extract from Cantaloupe melon nanoencapsulated in porcine gelatin. HGLI: diet with a high glycemic index and high glycemic load.

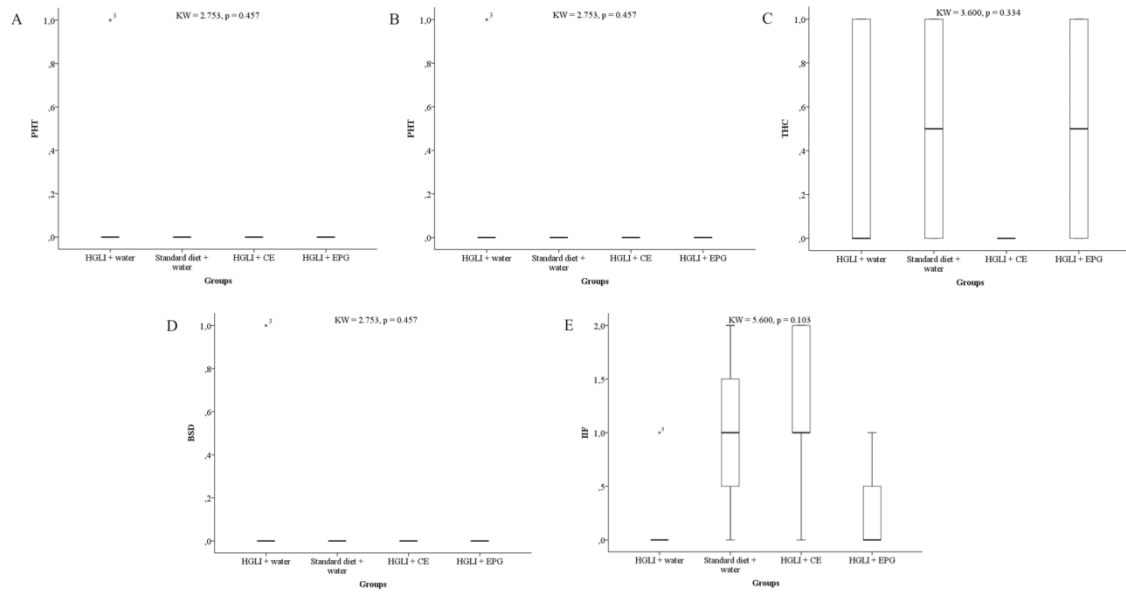

**Supplementary Fig. S2. Scores of semiquantitative histopathological evaluation of the renal sections of the four groups of Wistar rats submitted to different treatments for ten days.** CE: crude carotenoid extract from Cantaloupe melon (*Cucumis melo* L.). (A) PHT: presence of hypertrophic tubules. (B) GH: glomerular hyalinization. (C) THC: tubular hyaline cylinders. (D) BSD: Bowman's space dilation. (E) IIF: inflammatory infiltrate foci. KW: Kruskal-Wallis test. EPG: crude carotenoid extract from Cantaloupe melon nanoencapsulated in porcine gelatin. HGLI: diet with a high glycemic index and high glycemic load.
